# Supplementary material
Source: ML conference proceedings conference paper supplement (https://openreview.net/forum?id=OVH00XQTxwx)

Input

Baseline FSL

Proposed

Ground Truth

Case 23

(a)

Case 38

(b)

Case 18

(c)

Case 6

(d)

Case 42

(e)

Case 3

(f)

Case 48

(g)

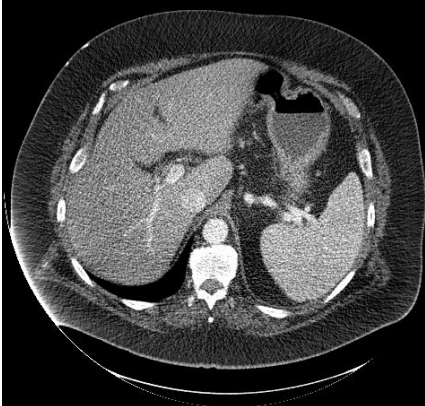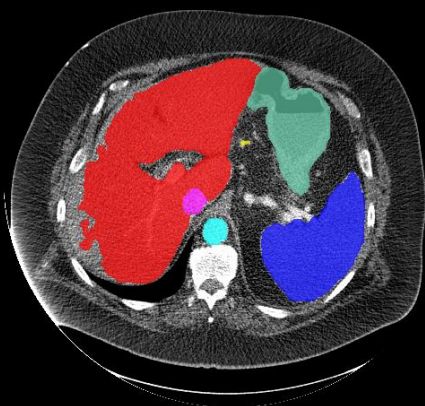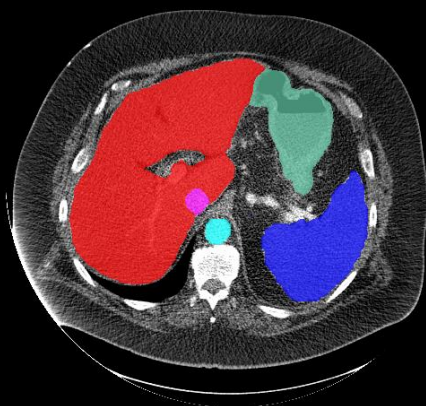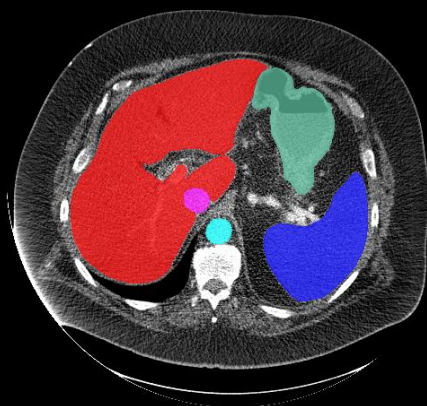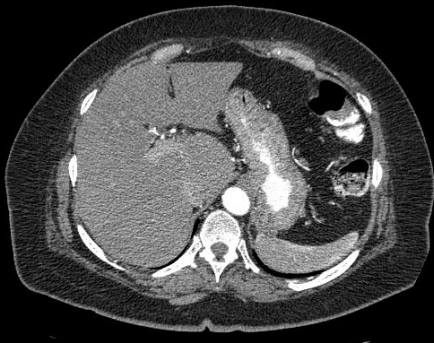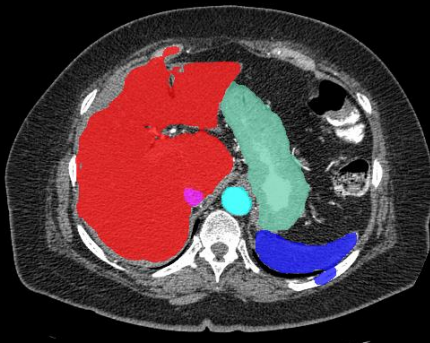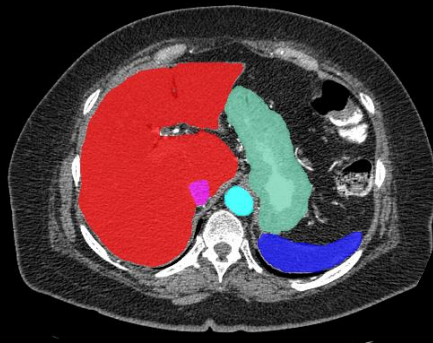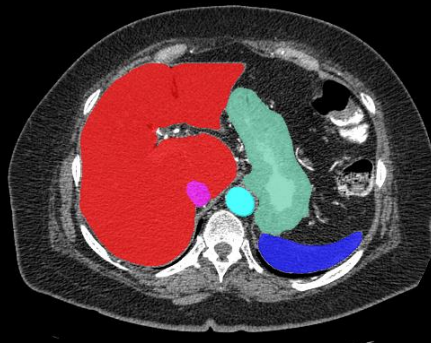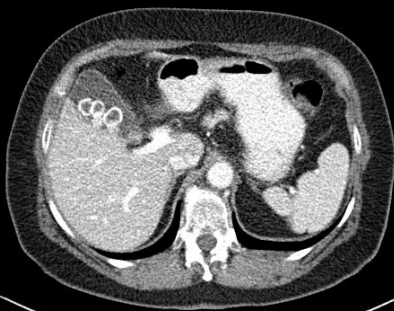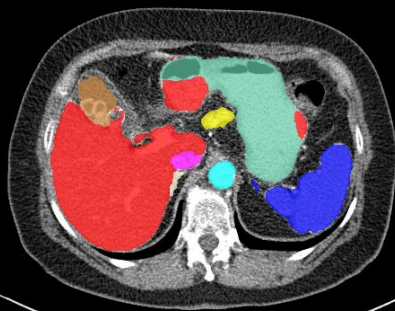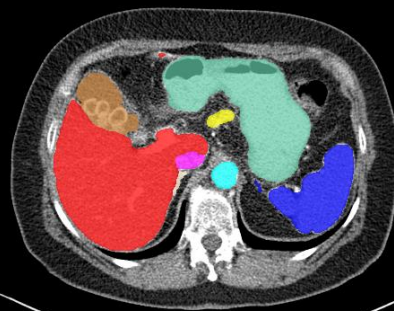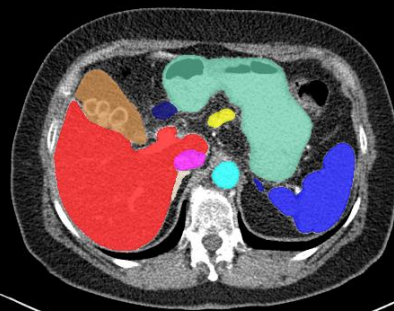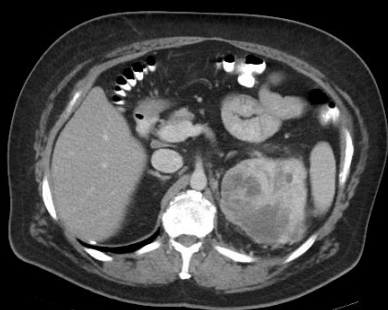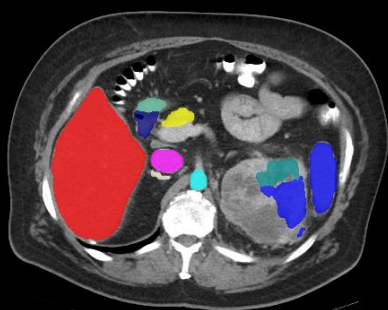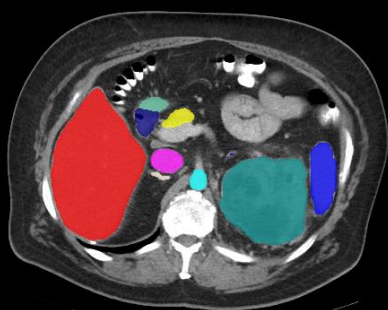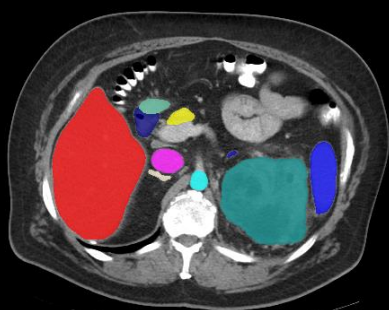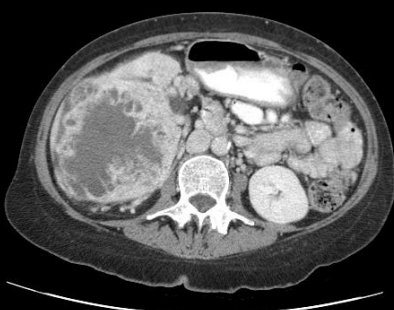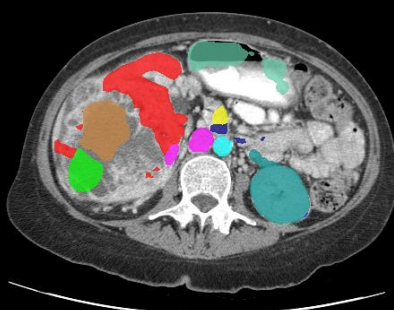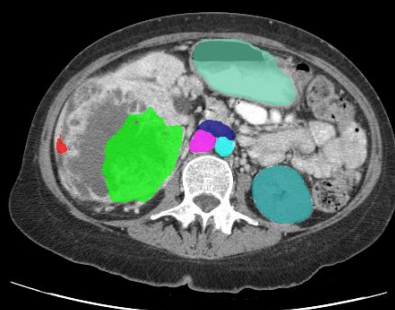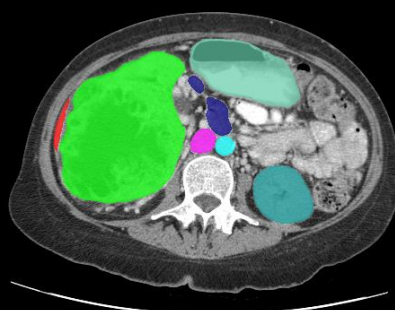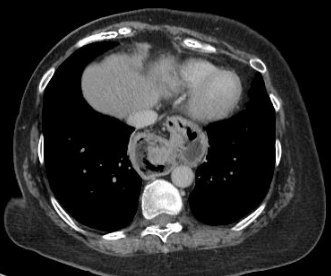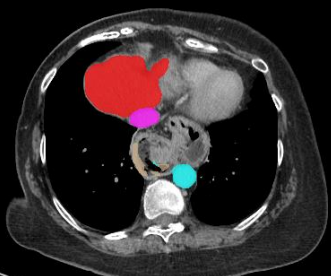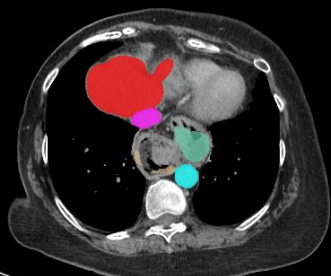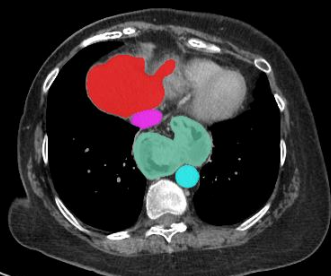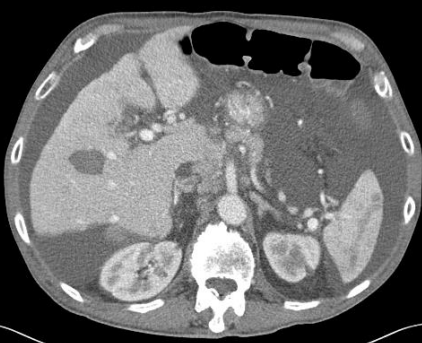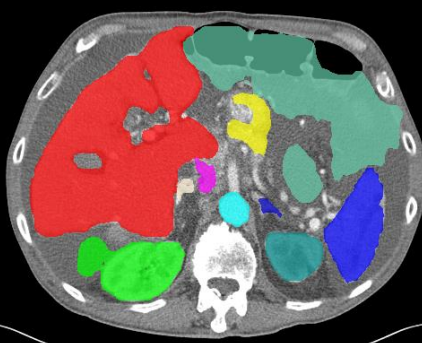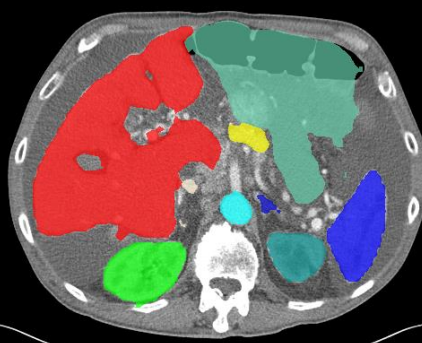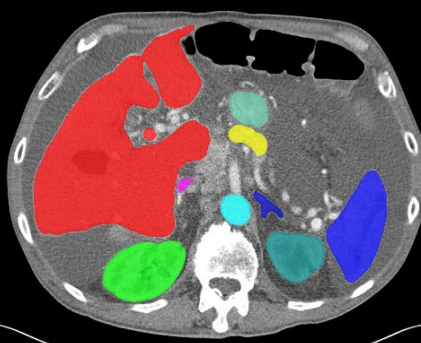

Supplement: supplementary_material [file attachment]

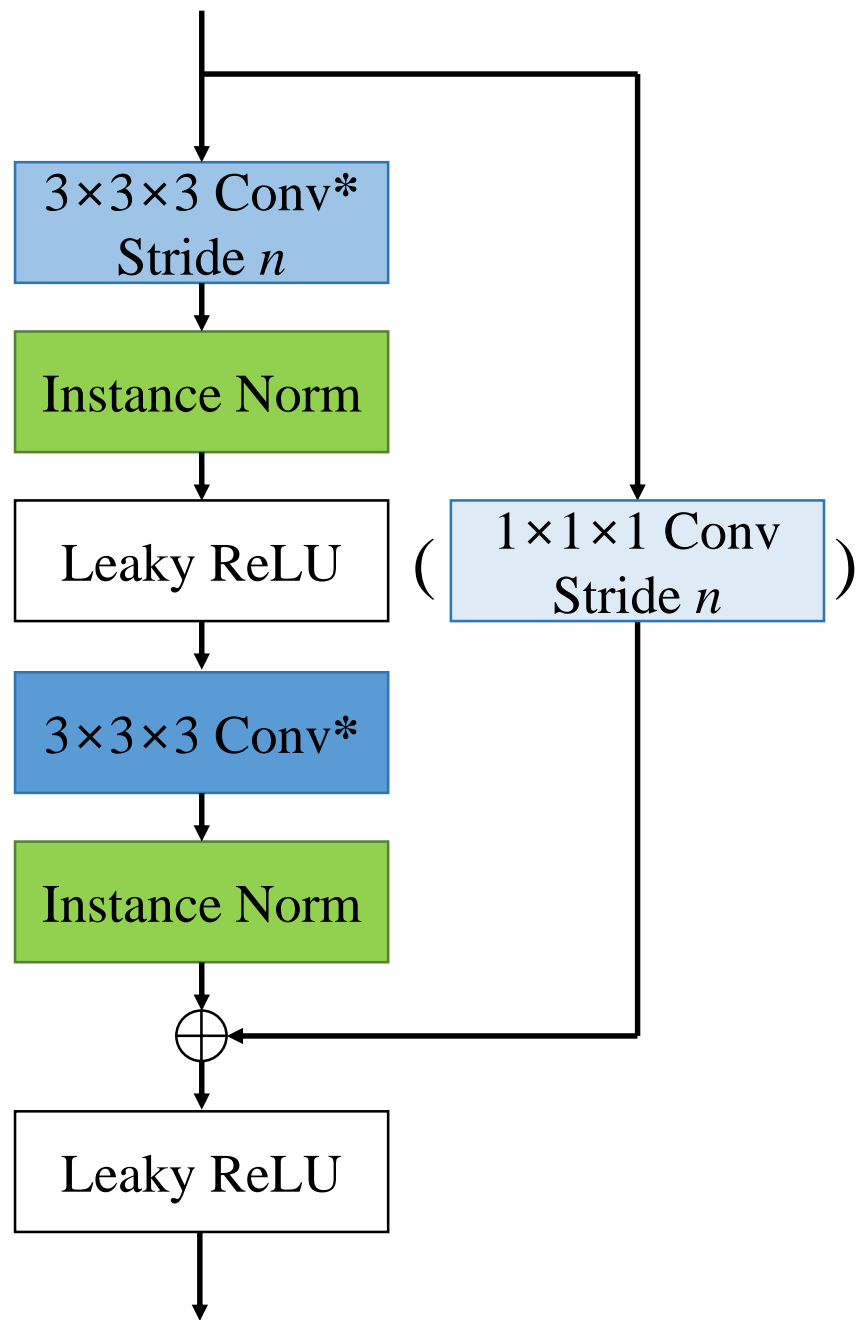

(a)

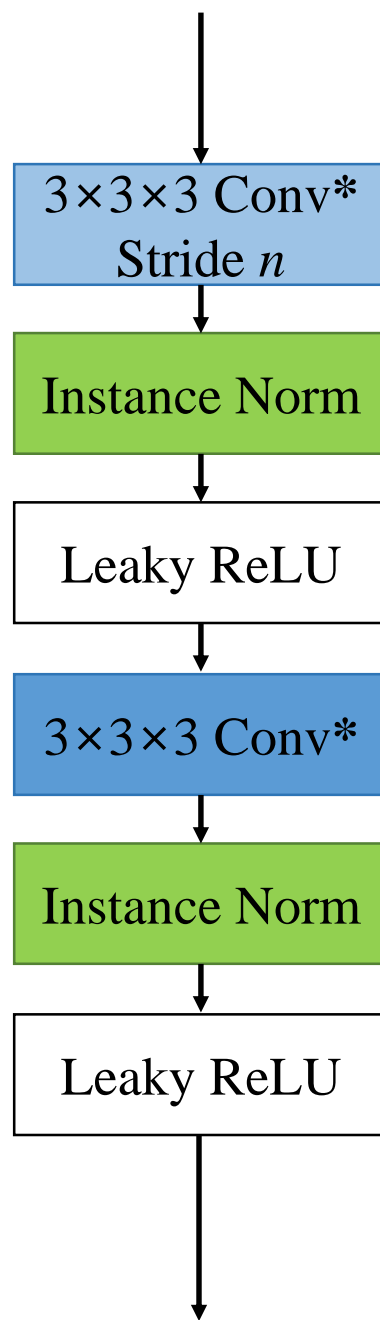

(b)

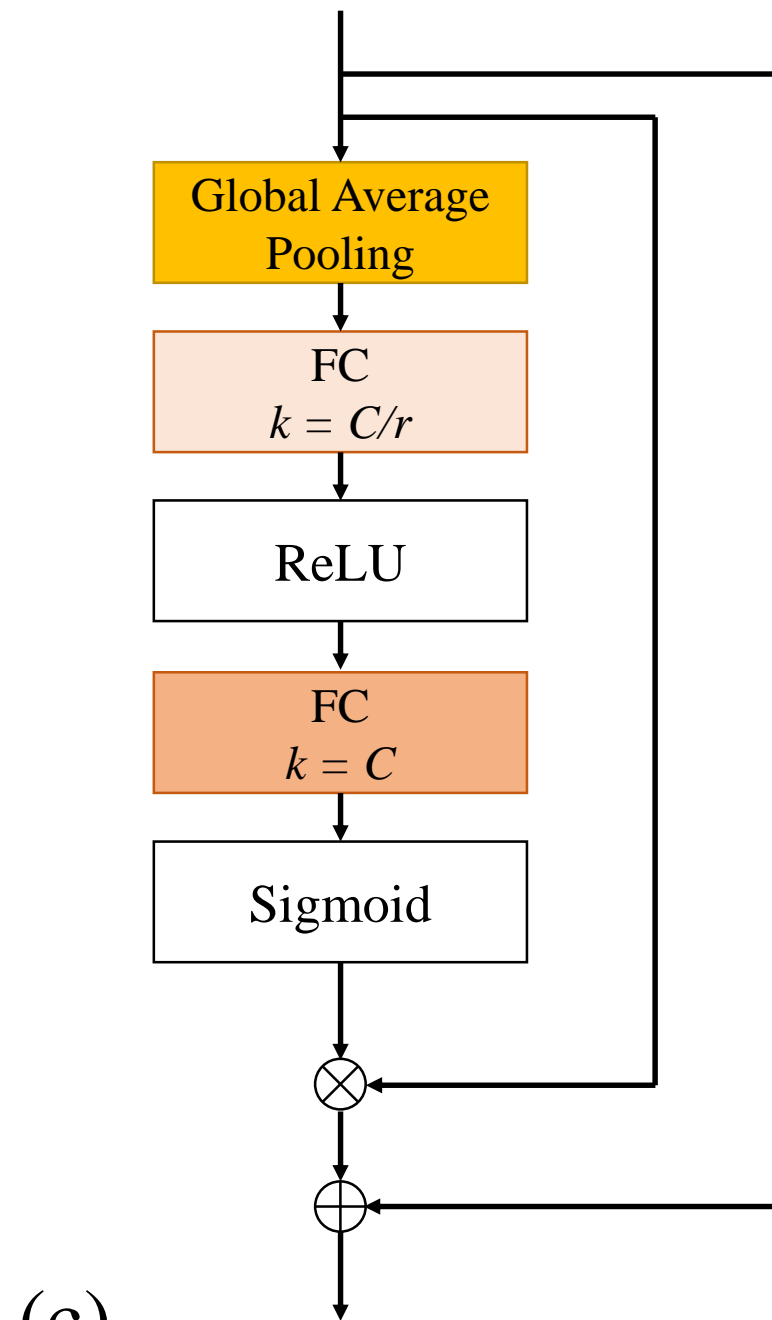

(c)

Supplement: supplementary_material [file attachment]

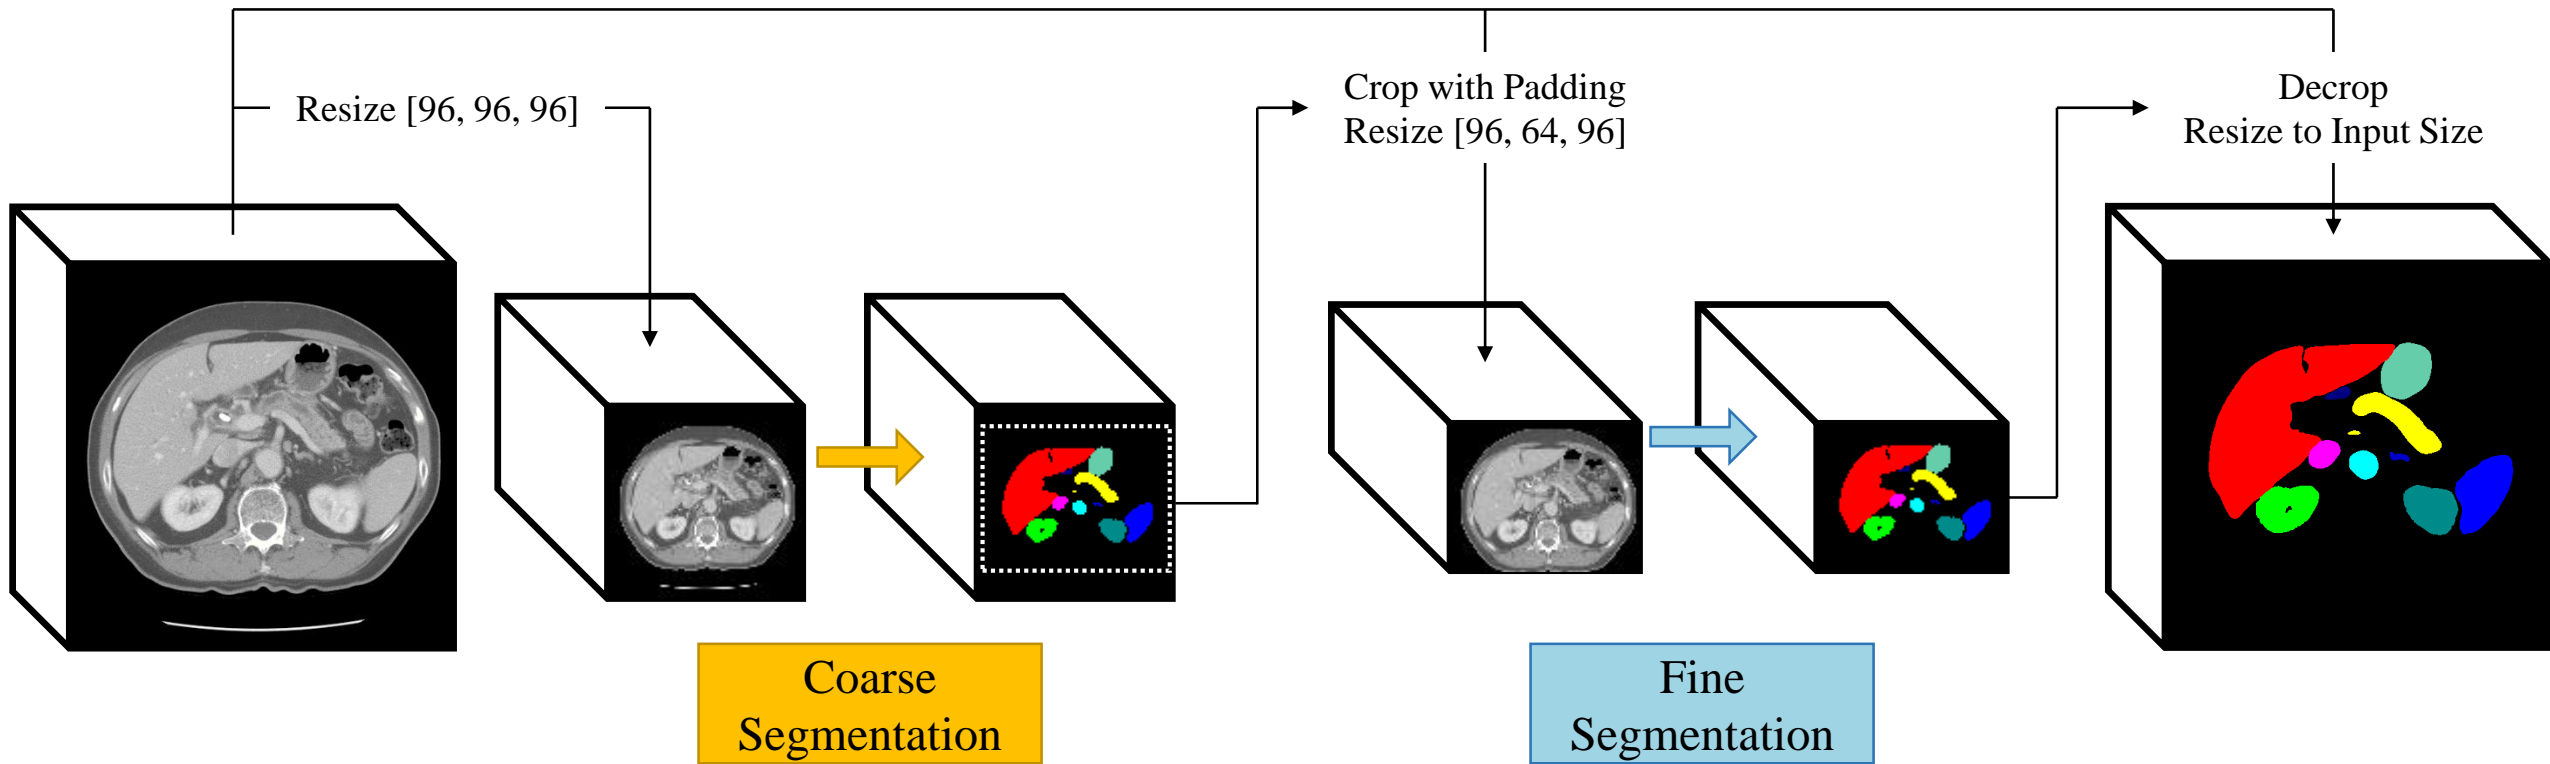

Supplement: supplementary_material [file attachment]

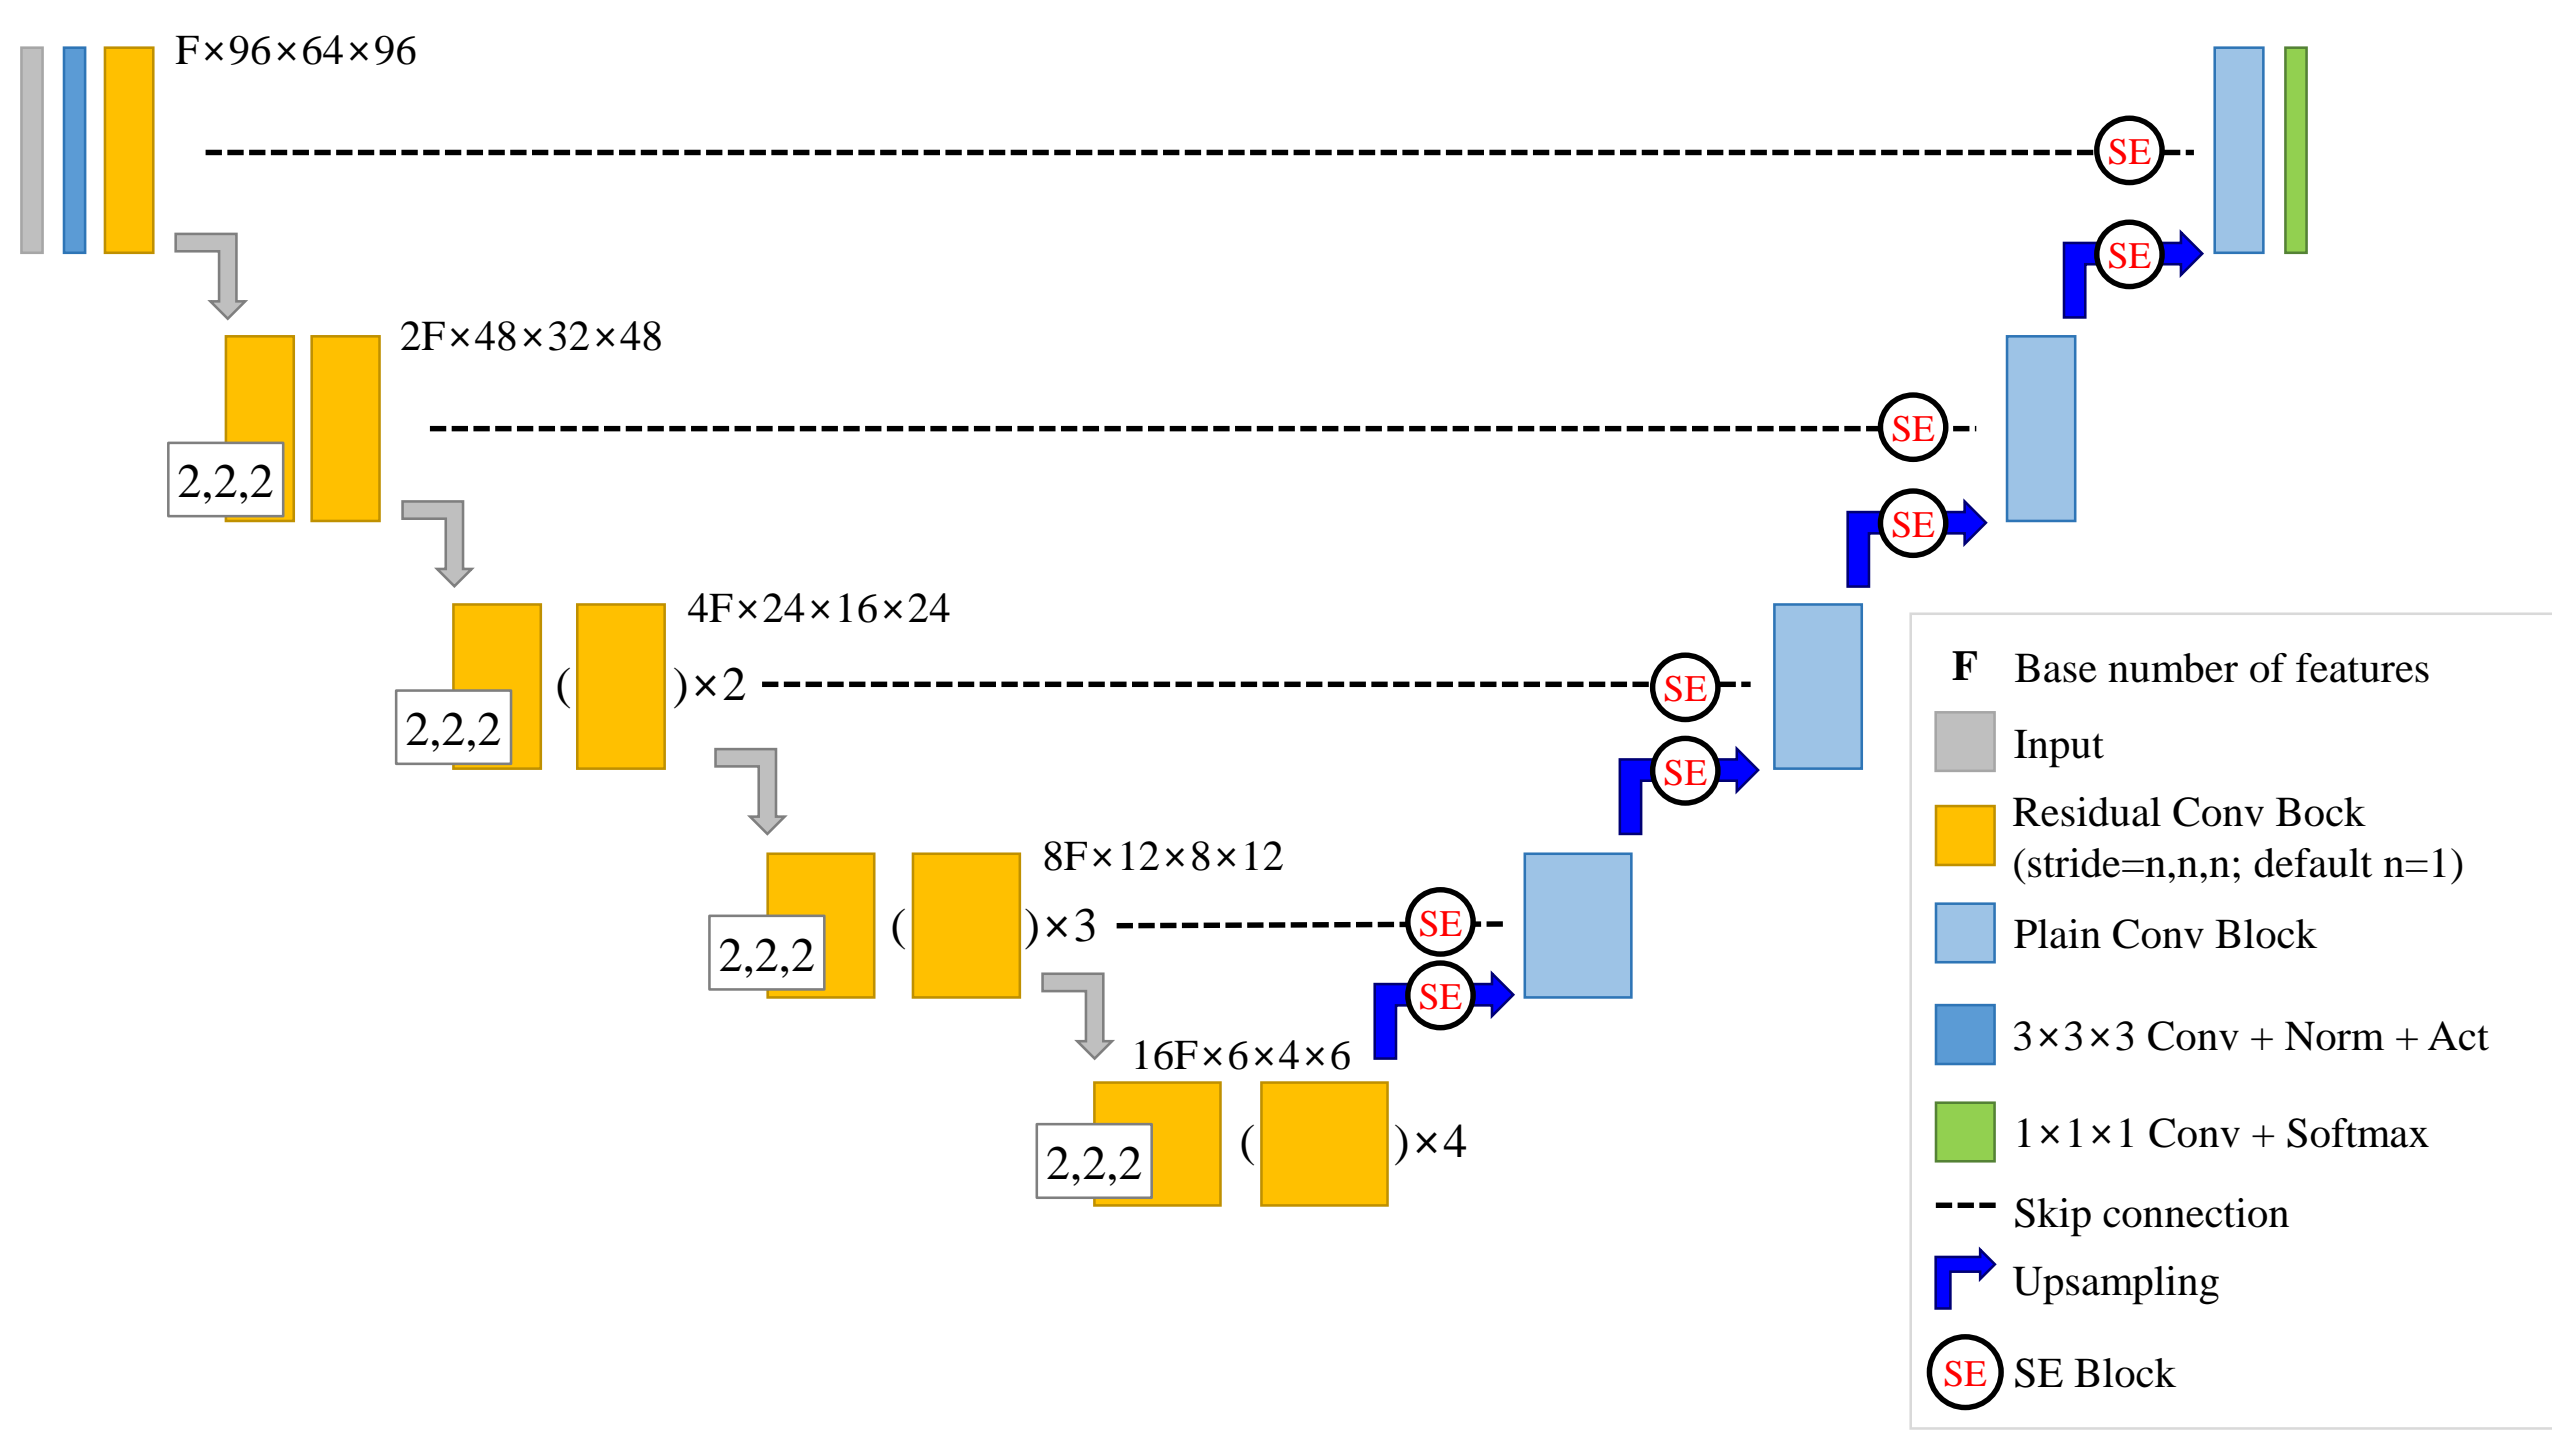

Supplement: supplementary_material [file attachment]

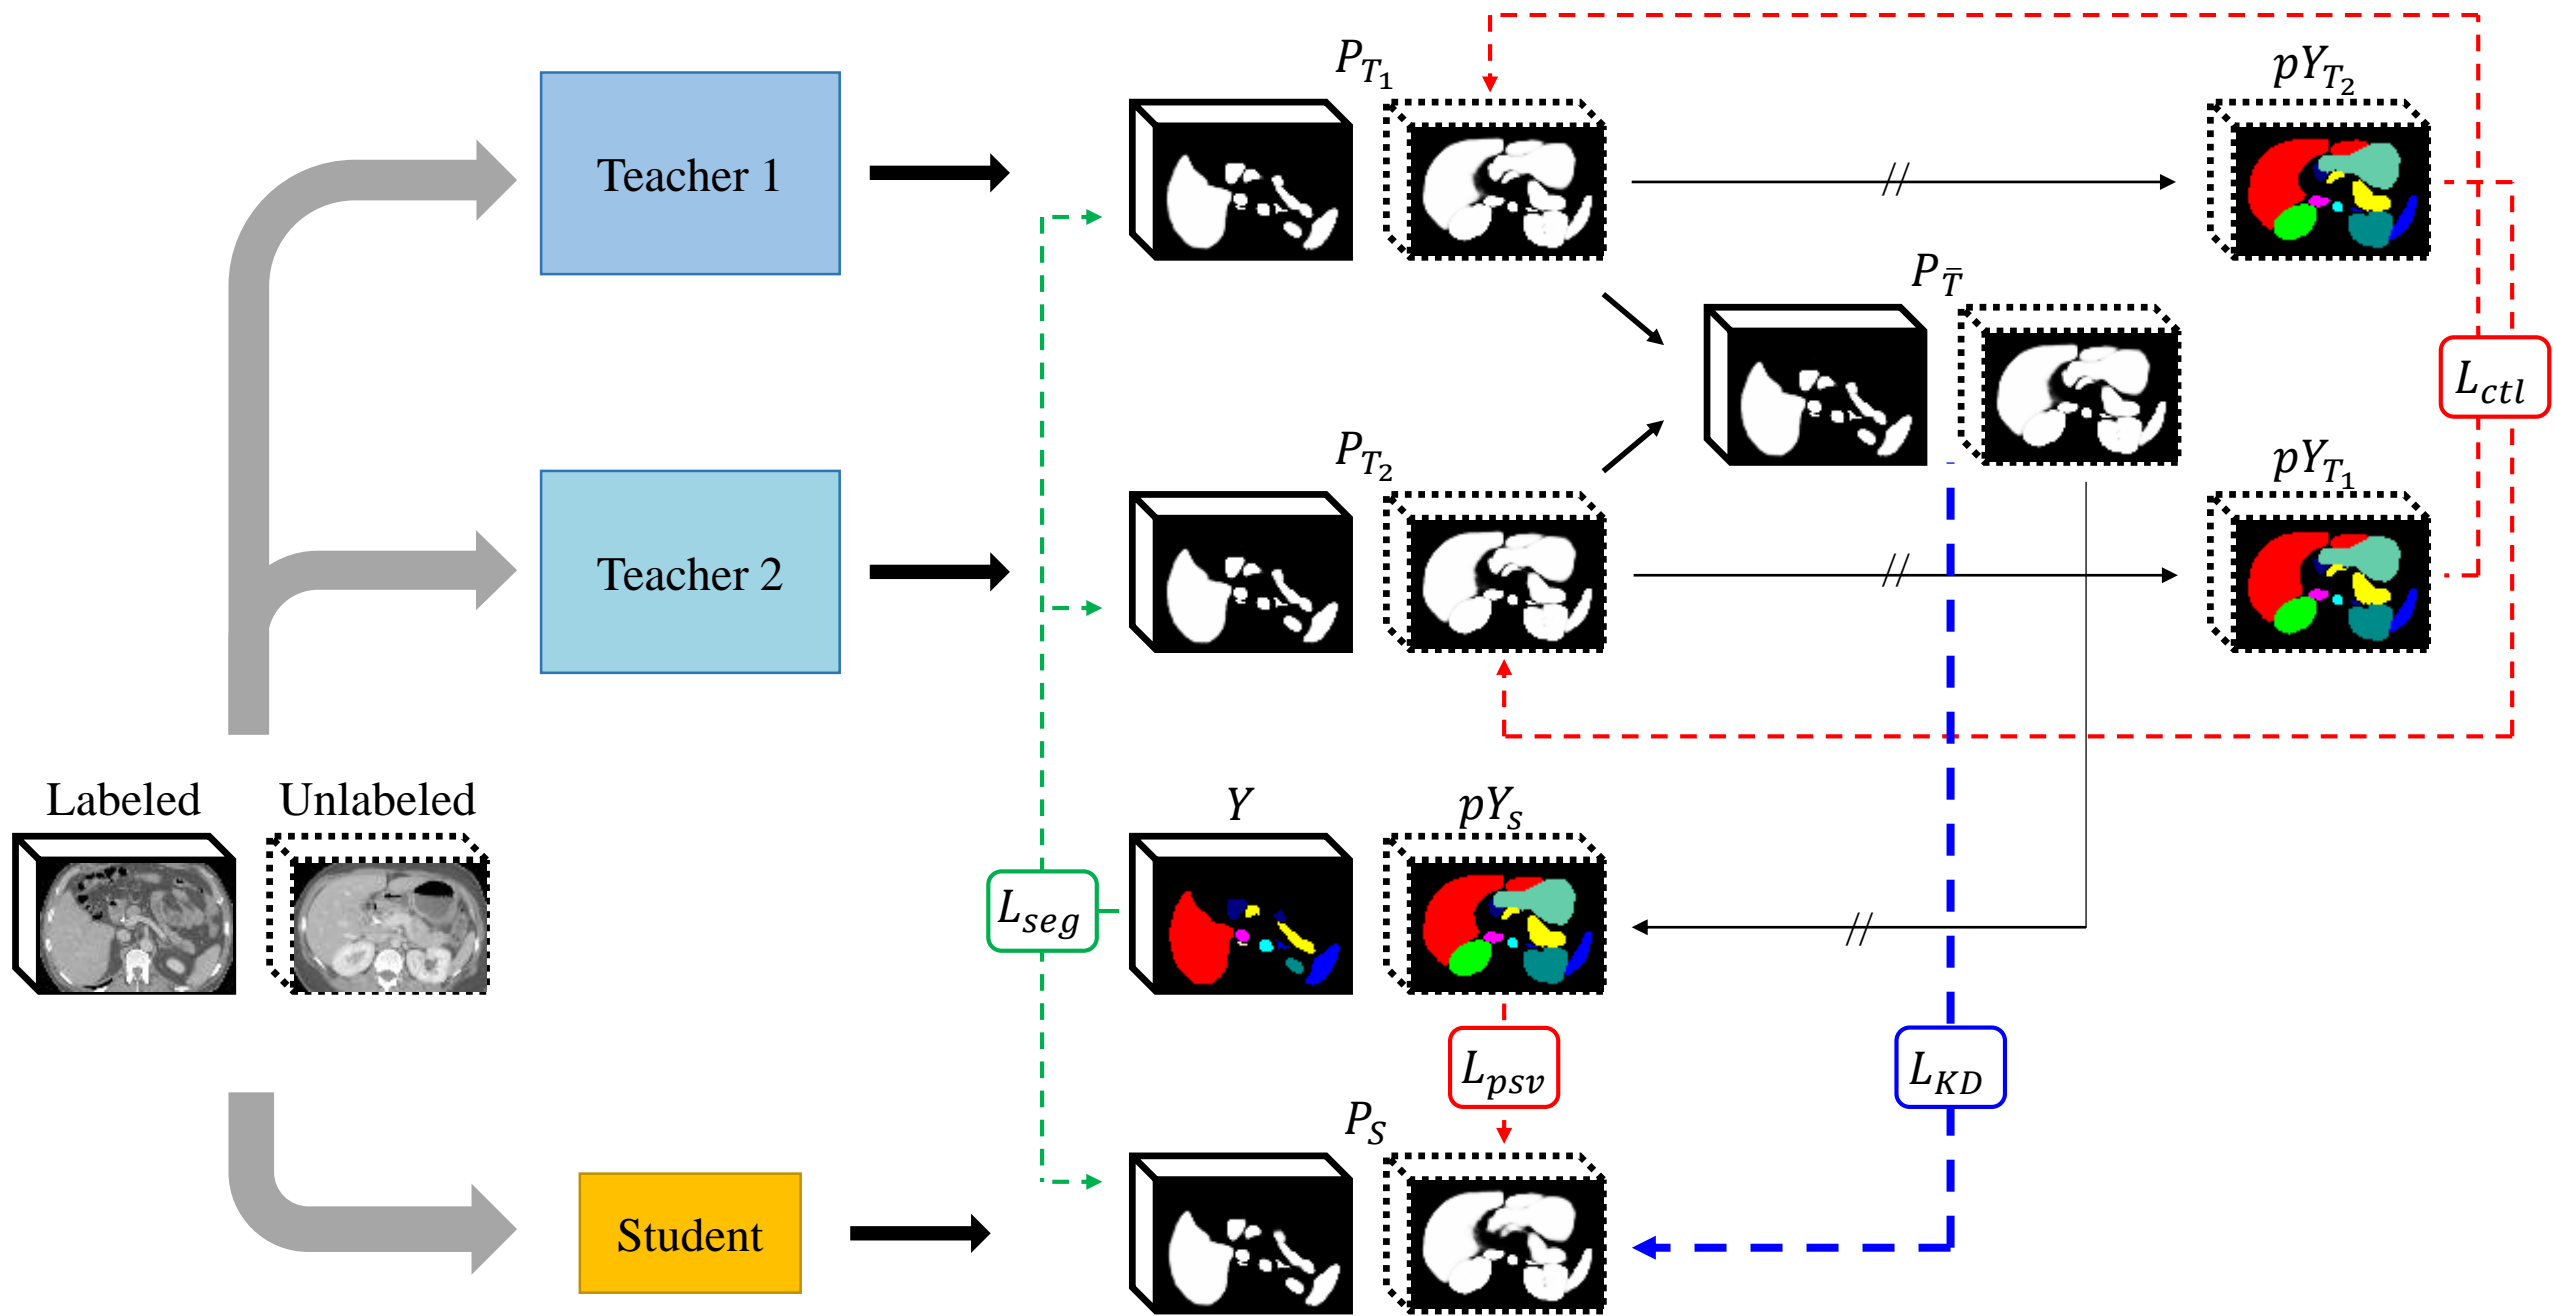

Supplement: supplementary_material [file attachment]
